# Supplementary material for: Aerosol pH and liquid water content determine when particulate matter is sensitive to ammonia and nitrate availability
Source: Copernicus journal article supplement (doi:10.5194/acp-20-3249-2020), 2020-03-18
Supplement: Supplementary file 1 [file acp-20-3249-2020-supplement.zip]

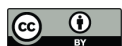

## *Supplement of*

# **Aerosol pH and liquid water content determine when particulate matter is sensitive to ammonia and nitrate availability**

**Athanasios Nenes et al.**

*Correspondence to:* Athanasios Nenes ([athanasios.nenes@epfl.ch](mailto:athanasios.nenes@epfl.ch))

- [acp-20-3249-2020-supplement-title-page.pdf](#)
- [Sigmoids\\_CharacteristicpH.xlsx](#)

The copyright of individual parts of the supplement might differ from the CC BY 4.0 License.
